# Supplementary material for: Improving self-efficacy in spinal cord injury patients through “design thinking" rehabilitation workshops
Source: PubMed Central journal article supplement — BMJ Qual Improv Rep. 2014 Oct 16;3(1):u205728.w2340. doi: 10.1136/bmjquality.u205728.w2340 (PMC4949616; doi:10.1136/bmjquality.u205728.w2340), 2014-10-16
Supplement: bmjqir.u205728.w2340-s1.pdf [file bmjqir.u205728.w2340-s1.pdf]

**Table 1: Mean EQ-5D and PAM scores pre and post intervention.**

|             | Pre-intervention                 | Post-intervention                | Paired T-test | P-value |
|-------------|----------------------------------|----------------------------------|---------------|---------|
| EQ-5D score | N = 17<br>0.232 (0.076 to 0.387) | N = 17<br>0.369 (0.201 to 0.538) | -3.13         | 0.007   |
| EQ-5D VAS   | N = 20<br>61.6 (49.6 to 73.6)    | N = 20<br>67.6 (57.1 to 78.1)    | -0.98         | 0.337   |
| PAM score   | N = 17<br>55.9 (48.8 to 62.9)    | N = 17<br>67.5 (58.0 to 76.9)    | -3.85         | 0.001   |

**Table 2: Mean ADAPSS and PMnac scores over time**

|                          | WS1                     | WS2                    | WS3                    | WS4                    | ANOVA                       | p-value |
|--------------------------|-------------------------|------------------------|------------------------|------------------------|-----------------------------|---------|
| ADAPSS score<br>(N = 16) | 21.9<br>(19.58 to 24.4) | 21.4<br>(18.5 to 24.4) | 21.8<br>(19.4 to 24.3) | 24.3<br>(22.5 to 26.1) | F <sub>3,68</sub> =<br>1.92 | 0.135   |
| PMnac score<br>(N = 14)  | 16.3<br>(14.7 to 17.8)  | 14.9<br>(12.6 to 17.2) | 15.4<br>(13.4 to 17.5) | 16.0<br>(14.5 to 17.5) | F <sub>3,65</sub> =<br>0.23 | 0.876   |

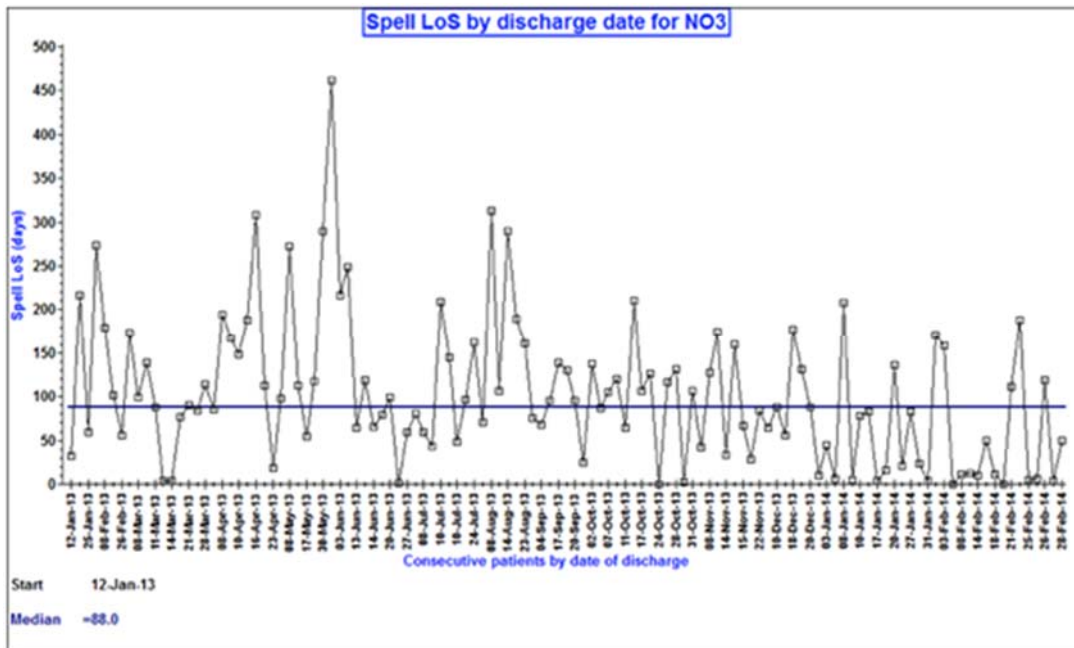

Spell LoS for consecutive discharges from NO1

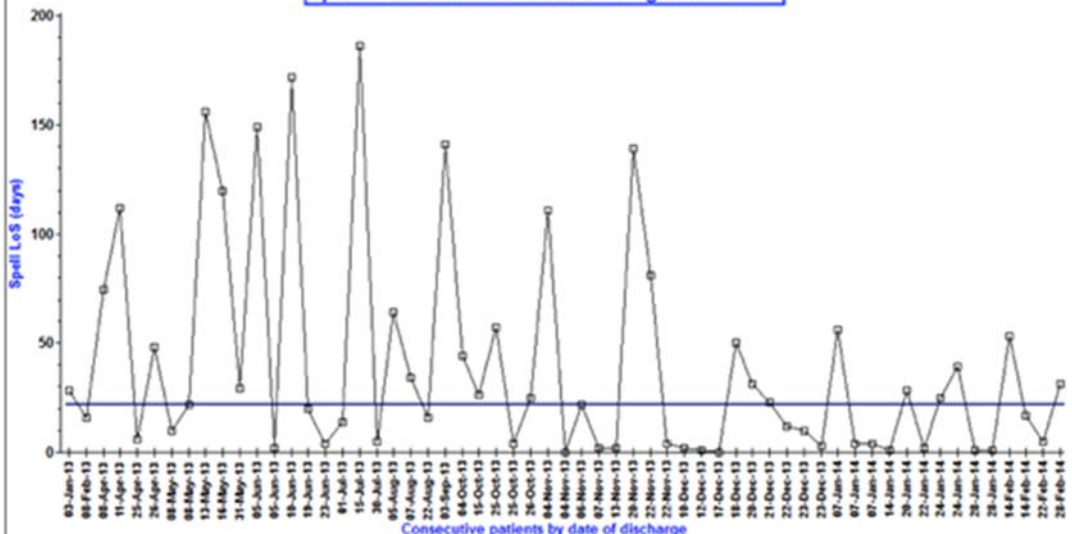

Start 03-Jan-13  
Median ~22.0
